# Supplementary material
Source: MDPI journal article supplement (https://www.mdpi.com/2311-5637/9/10/899)
Supplement: s1 [file s1]

Supplementary Table S1. LB components and contents

| Components           | Contents |
|----------------------|----------|
| yeast extract powder | 0.5%     |
| peptone              | 1%       |
| NaCl                 | 1%       |

Supplementary Table S2. LBG components and contents

| Components           | Contents |
|----------------------|----------|
| yeast extract powder | 0.5%     |
| peptone              | 1%       |
| NaCl                 | 1%       |
| glucose              | 0.5%     |

Supplementary Table S3. CgXII components and contents

| Components                                         | Contents  |
|----------------------------------------------------|-----------|
| (NH <sub>4</sub> ) <sub>2</sub> SO <sub>4</sub>    | 2%        |
| urea                                               | 0.5%      |
| KH <sub>2</sub> PO <sub>4</sub>                    | 0.1%      |
| MgSO <sub>4</sub> ·7H <sub>2</sub> O               | 0.025%    |
| K <sub>2</sub> HPO <sub>4</sub> ·3H <sub>2</sub> O | 0.1%      |
| 3-(n-morphine) -propanesulfonic acid               | 4.2%      |
| CaCl <sub>2</sub>                                  | 0.001%    |
| FeSO <sub>4</sub> ·7H <sub>2</sub> O               | 0.001%    |
| MnSO <sub>4</sub> ·H <sub>2</sub> O                | 0.001%    |
| ZnSO <sub>4</sub> ·7H <sub>2</sub> O               | 0.001%    |
| CuSO <sub>4</sub> ·5H <sub>2</sub> O               | 0.00002%  |
| NiCl <sub>2</sub> ·6H <sub>2</sub> O               | 0.00002%  |
| biotin                                             | 0.00002%  |
| Thick catechuic acid                               | 0.000003% |

Supplementary Table S4. EPO components and contents

| Components           | Contents |
|----------------------|----------|
| yeast extract powder | 0.5%     |
| peptone              | 1%       |
| NaCl                 | 1%       |
| Tween 80             | 0.1%     |
| glycine              | 3%       |

Supplementary Table S5. LBHISG components and contents

| Components              | Contents |
|-------------------------|----------|
| yeast extract powder    | 0.25%    |
| peptone                 | 0.5%     |
| NaCl                    | 0.5%     |
| Brain and heart extract | 1.85%    |
| glucose                 | 0.25%    |
| sorbitol                | 9.1%     |

Supplementary Table S6. Composition and content of fermentation medium

| Components                                      | Contents |
|-------------------------------------------------|----------|
| glucose                                         | 2.0%     |
| corn steep liquor                               | 0.05%    |
| molasses                                        | 1.6%     |
| phosphoric acid                                 | 0.06%    |
| (NH <sub>4</sub> ) <sub>2</sub> SO <sub>4</sub> | 1.20%    |
| MgSO <sub>4</sub>                               | 0.20%    |
| KCl                                             | 0.05%    |
| betaine                                         | 0.05%    |
| FeSO <sub>4</sub>                               | 0.03%    |
| MnSO <sub>4</sub>                               | 0.03%    |
| ZnSO <sub>4</sub>                               | 0.005%   |
| CuSO <sub>4</sub>                               | 0.005%   |
| vitamin B1                                      | 0.0005%  |
| L-threonine                                     | 0.025%   |

Supplementary Table S7 Primers list

| Primer                   | Sequence(5'→3')                           | Size<br>(bp) | Restriction<br>site |
|--------------------------|-------------------------------------------|--------------|---------------------|
| t-Lys-F1                 | gtggtggtggtggtgctcgagGTGCAGGATAAAATCCCGCC | 40           | <i>Xho</i> I        |
| t-Lys-R1                 | ggtcacgagagaattcACTTTTTCGTTGCTTTCGGTTT    | 38           |                     |
| t-Lys-F2                 | cgagctcggtaccATGTAAAAAGCGCCCTAAAGG        | 35           |                     |
| t-Lys-R2                 | cagcaaatgggtcgcggatccATGCTTAACGGCGTCGGC   | 39           | <i>Bam</i> HI       |
| Kanr-F                   | aagtGAATTCTCCGTGGACCTGCA                  | 24           |                     |
| Kanr-R                   | ttacatGGTACCGAGCTCGGATCCG                 | 27           |                     |
| staygold <sup>r</sup> -F | ATGGCTAGTACACCATTAAATTTC                  | 25           |                     |
| rpl <sup>r</sup> -R      | TTATTTGATAGTTTCGCTGTTAGATTG               | 28           |                     |
| L21 <sup>r</sup> -R      | TTAAGATTTTTTTGTGGTTTTTTTTGC               | 27           |                     |

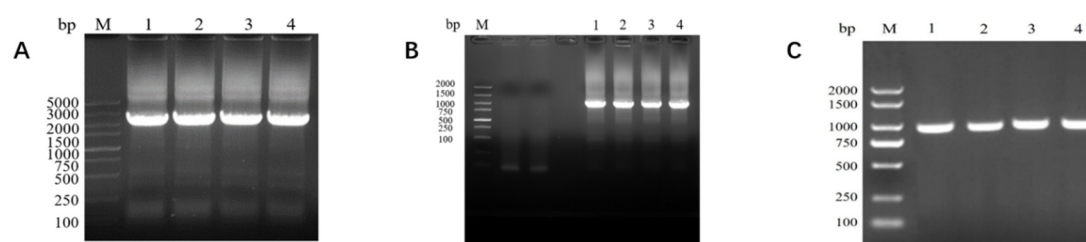

Supplementary Figure S1 Gel electrophoresis of PCR products.

(A) PCR gel showing the expected product insert size of 2324 bp for Knock out box gene fragments.

M, DL5000 DNA marker. (B) PCR gel showing the expected product delete size of 1324 bp for

Kanr fragments. M, DL2000 DNA marker. (C) PCR gel showing the expected product insert

size of 1008 and 1026 bp for *staygold-rpl<sup>r</sup>* and *staygold-L21<sup>r</sup>* gene fragments separately. M,

DL2000 DNA marker.

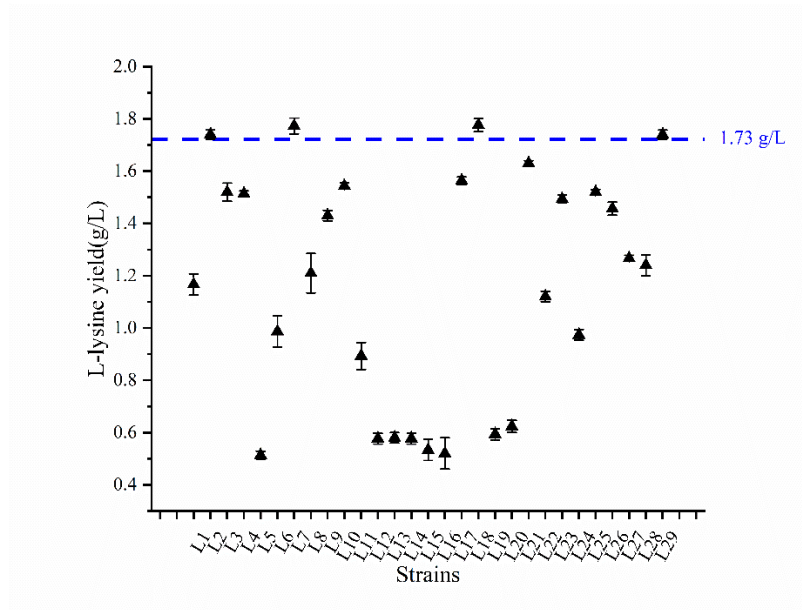

**Supplementary Figure S2** The L-lysine produced by the original strain and the mutated strains.

29 mutant strains of *E. coli*  $\Delta tRNA$  *egfp* were selected on 96-well plates, blue line indicates the highest L-lysine group three parallel fermentation yield of the starting *E. coli* QD01 $\Delta tRNA$ , 1.73 g/L. Among the 29 mutant strains, 4 with improved L-lysine yields were screened.

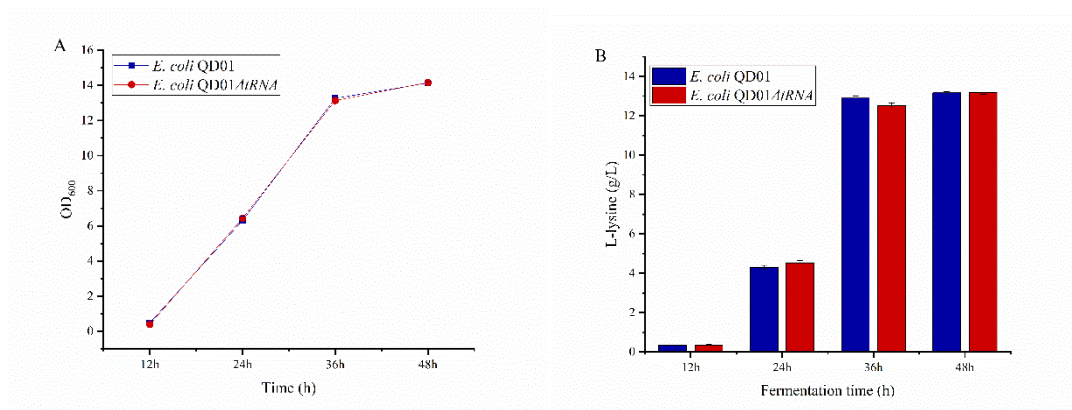

**Supplementary Figure S3** OD<sub>600</sub> values and L-lysine production of *E. coli* QD01 and *E. coli* QD01 $\Delta tRNA$  (fermentation medium). (A) These two strains had comparable OD<sub>600</sub> values. (B) We detected no significant difference between the strains with respect to L-lysine production ( $p > 0.05$ ).
